# Supplementary material
Source: publisher site journal article supplement (https://www.degruyterbrill.com/publication/isbn/9783110229141/downloadAsset/9783110229141_Inhaltsverzeichnis.pdf)
Supplement: Supplementary file 1 [file 9783110229141_Inhaltsverzeichnis.pdf]

# Inhalt

|                                                                                                                                                                             |     |
|-----------------------------------------------------------------------------------------------------------------------------------------------------------------------------|-----|
| <i>Lilith Jappe, Olav Krämer, Fabian Lampart</i>                                                                                                                            |     |
| Einleitung. Figuren, Wissen, Figurenwissen . . . . .                                                                                                                        | 1   |
| <i>Manuele Gragnolati (Oxford / Berlin)</i>                                                                                                                                 |     |
| Sehnsucht nach Umarmungen. Melancholie und Körperlichkeit<br>in Dantes eschatologischer Anthropologie . . . . .                                                             | 36  |
| <i>Almut Suerbaum (Oxford)</i>                                                                                                                                              |     |
| Wissen als Macht. Figurendarstellung in Thürings von<br>Ringoltingen <i>Melusine</i> . . . . .                                                                              | 54  |
| <i>Daniel Fulda (Halle)</i>                                                                                                                                                 |     |
| „Sçavoir l’Histoire; c’est connoitre les hommes“. Figurenwissen<br>und Historiographie vom späten 17. Jahrhundert bis Schiller . . .                                        | 75  |
| <i>Johannes Süßmann (Paderborn)</i>                                                                                                                                         |     |
| Charakterisieren. Dilemma und Kunst der historiographischen<br>Figurenzeichnung . . . . .                                                                                   | 114 |
| <i>Frank Zipfel (Mainz)</i>                                                                                                                                                 |     |
| Schein und Sein in Briefen. Über das Verhältnis von Figuren-<br>darstellung und Anthropologie in Choderlos de Laclos’<br><i>Les liaisons dangereuses</i> . . . . .          | 133 |
| <i>Wolfgang Lukas (Wuppertal)</i>                                                                                                                                           |     |
| „Figurenwissen“ vs. „Textwissen“. Zur literarischen Archäologie<br>des psychischen „Unbewussten“ in der Erzählliteratur der<br>ersten Hälfte des 19. Jahrhunderts . . . . . | 170 |
| <i>Michael Scheffel (Wuppertal)</i>                                                                                                                                         |     |
| Figurationen der Leidenschaft. Die erzählte Gesellschaft<br>des Honoré de Balzac . . . . .                                                                                  | 201 |
| <i>Dorothee Birke (Freiburg i. Br.)</i>                                                                                                                                     |     |
| Zur Rezeption und Funktion von „Typen“.<br>Figurenkonzeption bei Charles Dickens . . . . .                                                                                  | 220 |
| <i>Friederike Carl (Freiburg i. Br.)</i>                                                                                                                                    |     |
| Ideenträger und Ideenzerstörer. Figuren in Dostoevskijs<br><i>Besj (Böse Geister)</i> . . . . .                                                                             | 241 |

*Katharina Grätz (Freiburg i. Br.)*

„Nicht bloß Typ und nicht bloß Individuum“.

Figuren in Theodor Fontanes Gesellschaftsromanen . . . . . 258

*Thorsten Fitzon (Freiburg i. Br.)*

Figur und Figuration. Perspektivierung sterblicher Zeit

in Wilhelm Raabes *Altershausen* . . . . . 279

*Michael Butter (Freiburg i. Br.)*

Was Leser mit Figuren lernen.

Henry James' „The Real Thing“ (1892) und

Stephen Cranes „An Experiment in Misery“ (1894) . . . . . 307

*Maximilian Bergengruen (Genf)*

Moosbruggers Welt. Zur Figuration von Strafrecht und

Forensik in Robert Musils *Der Mann ohne Eigenschaften* . . . . . 324

*Anja Stukenbrock (Freiburg i. Br.)*

Zur Beredsamkeit des Körpers. Figurendarstellung und

Figurenwissen als multimodale Alltagsinszenierung . . . . . 345

*Christian Budnik (Bern)*

Narrative Theorien personaler Identität . . . . . 386

Autorinnen und Autoren . . . . . 403
